# Supplementary material
Source: publisher figshare collection journal article supplement (https://acs.figshare.com/ndownloader/files/5110588)
Supplement: Supplementary file 1 [file 5110588]

 
data_c:\x-ray\05039\try 
 
_audit_creation_method            SHELXL-97 
_chemical_name_systematic 
; 
 ? 
; 
_chemical_name_common             '[Me3NN]Ni-NAd(h4-C5H5CoCp)' 
_chemical_melting_point           ? 
_chemical_formula_moiety          ? 
_chemical_formula_sum 
 'C43 H54 Co N3 Ni' 
_chemical_formula_weight          730.53 
 
loop_ 
 _atom_type_symbol 
 _atom_type_description 
 _atom_type_scat_dispersion_real 
 _atom_type_scat_dispersion_imag 
 _atom_type_scat_source 
 'C'  'C'   0.0033   0.0016 
 'International Tables Vol C Tables 4.2.6.8 and 6.1.1.4' 
 'H'  'H'   0.0000   0.0000 
 'International Tables Vol C Tables 4.2.6.8 and 6.1.1.4' 
 'N'  'N'   0.0061   0.0033 
 'International Tables Vol C Tables 4.2.6.8 and 6.1.1.4' 
 'Co'  'Co'   0.3494   0.9721 
 'International Tables Vol C Tables 4.2.6.8 and 6.1.1.4' 
 'Ni'  'Ni'   0.3393   1.1124 
 'International Tables Vol C Tables 4.2.6.8 and 6.1.1.4' 
 
_symmetry_cell_setting            Orthorhombic 
_symmetry_space_group_name_H-M    Pna(2)1 
 
loop_ 
 _symmetry_equiv_pos_as_xyz 
 'x, y, z' 
 '-x, -y, z+1/2' 
 '-x+1/2, y+1/2, z+1/2' 
 'x+1/2, -y+1/2, z' 
 
_cell_length_a                    10.9909(9) 
_cell_length_b                    29.777(2) 
_cell_length_c                    11.2275(9) 
_cell_angle_alpha                 90.00 
_cell_angle_beta                  90.00 
_cell_angle_gamma                 90.00 
_cell_volume                      3674.5(5) 
_cell_formula_units_Z             4 
_cell_measurement_temperature     173(2) 
_cell_measurement_reflns_used     5858 
_cell_measurement_theta_min       2.303 
_cell_measurement_theta_max       27.974 
 
_exptl_crystal_description        chunk 
_exptl_crystal_colour             red 
_exptl_crystal_size_max           0.36 
_exptl_crystal_size_mid           0.28 
_exptl_crystal_size_min           0.27 
_exptl_crystal_density_meas       ? 
_exptl_crystal_density_diffrn     1.321 
_exptl_crystal_density_method     'not measured' 
_exptl_crystal_F_000              1552 
_exptl_absorpt_coefficient_mu     0.998 
_exptl_absorpt_correction_type    multi-scan 
_exptl_absorpt_correction_T_min   0.821 
_exptl_absorpt_correction_T_max   1.000 
_exptl_absorpt_process_details    
'SADABS based on Blessing's method; Blessing, Acta Cryst. (1995) A51 33-38'  
 
_exptl_special_details 
; 
 ? 
; 
 
_diffrn_ambient_temperature       173(2) 
_diffrn_radiation_wavelength      0.71073 
_diffrn_radiation_type            MoK\a 
_diffrn_radiation_source          'fine-focus sealed tube' 
_diffrn_radiation_monochromator   graphite 
_diffrn_measurement_device_type   ? 
_diffrn_measurement_method        ? 
_diffrn_detector_area_resol_mean  ? 
_diffrn_standards_number          ? 
_diffrn_standards_interval_count  ? 
_diffrn_standards_interval_time   ? 
_diffrn_standards_decay_%         ? 
_diffrn_reflns_number             37901 
_diffrn_reflns_av_R_equivalents   0.0418 
_diffrn_reflns_av_sigmaI/netI     0.0424 
_diffrn_reflns_limit_h_min        -14 
_diffrn_reflns_limit_h_max        14 
_diffrn_reflns_limit_k_min        -38 
_diffrn_reflns_limit_k_max        39 
_diffrn_reflns_limit_l_min        -14 
_diffrn_reflns_limit_l_max        14 
_diffrn_reflns_theta_min          1.37 
_diffrn_reflns_theta_max          28.33 
_reflns_number_total              8763 
_reflns_number_gt                 7732 
_reflns_threshold_expression      >2sigma(I) 
 
_computing_data_collection        ? 
_computing_cell_refinement        ? 
_computing_data_reduction         ? 
_computing_structure_solution     'SHELXS-97 (Sheldrick, 1990)' 
_computing_structure_refinement   'SHELXL-97 (Sheldrick, 1997)' 
_computing_molecular_graphics     ? 
_computing_publication_material   ? 
 
_refine_special_details 
; 
 Refinement of F^2^ against ALL reflections.  The weighted R-factor wR and 
 goodness of fit S are based on F^2^, conventional R-factors R are based 
 on F, with F set to zero for negative F^2^. The threshold expression of 
 F^2^ > 2sigma(F^2^) is used only for calculating R-factors(gt) etc. and is 
 not relevant to the choice of reflections for refinement.  R-factors based 
 on F^2^ are statistically about twice as large as those based on F, and R- 
 factors based on ALL data will be even larger. 
; 
 
_refine_ls_structure_factor_coef  Fsqd  
_refine_ls_matrix_type            full 
_refine_ls_weighting_scheme       calc  
_refine_ls_weighting_details 
 'calc w=1/[\s^2^(Fo^2^)+(0.0623P)^2^+2.2749P] where P=(Fo^2^+2Fc^2^)/3' 
_atom_sites_solution_primary      direct 
_atom_sites_solution_secondary    difmap 
_atom_sites_solution_hydrogens    geom 
_refine_ls_hydrogen_treatment     mixed 
_refine_ls_extinction_method      none 
_refine_ls_extinction_coef        ? 
_refine_ls_abs_structure_details 
 'Flack H D (1983), Acta Cryst. A39, 876-881' 
_refine_ls_abs_structure_Flack    0.062(14) 
_refine_ls_number_reflns          8763 
_refine_ls_number_parameters      441 
_refine_ls_number_restraints      1 
_refine_ls_R_factor_all           0.0571 
_refine_ls_R_factor_gt            0.0472 
_refine_ls_wR_factor_ref          0.1212 
_refine_ls_wR_factor_gt           0.1148 
_refine_ls_goodness_of_fit_ref    1.118 
_refine_ls_restrained_S_all       1.118 
_refine_ls_shift/su_max           0.001 
_refine_ls_shift/su_mean          0.000 
 
loop_ 
 _atom_site_label 
 _atom_site_type_symbol 
 _atom_site_fract_x 
 _atom_site_fract_y 
 _atom_site_fract_z 
 _atom_site_U_iso_or_equiv 
 _atom_site_adp_type 
 _atom_site_occupancy 
 _atom_site_symmetry_multiplicity 
 _atom_site_calc_flag 
 _atom_site_refinement_flags 
 _atom_site_disorder_assembly 
 _atom_site_disorder_group 
Ni1 Ni 0.24165(3) 0.901731(12) 0.97480(5) 0.02043(10) Uani 1 1 d . . . 
Co2 Co 0.17259(4) 0.760523(15) 0.76599(5) 0.02756(12) Uani 1 1 d . . . 
N3 N 0.3040(2) 0.84634(9) 1.0022(2) 0.0205(6) Uani 1 1 d . . . 
N2 N 0.1080(3) 0.93308(9) 1.0378(3) 0.0227(6) Uani 1 1 d . . . 
N1 N 0.2929(3) 0.95003(9) 0.8793(3) 0.0216(6) Uani 1 1 d . . . 
C13 C 0.1071(3) 0.92262(11) 1.2544(3) 0.0219(7) Uani 1 1 d . . . 
C7 C 0.4039(3) 0.92484(11) 0.7005(3) 0.0246(7) Uani 1 1 d . . . 
C24 C 0.3838(3) 0.83529(11) 1.1044(3) 0.0216(7) Uani 1 1 d . . . 
C20 C 0.1945(3) 0.96089(12) 1.2691(4) 0.0307(7) Uani 1 1 d . . . 
H20A H 0.1492 0.9885 1.2867 0.046 Uiso 1 1 calc R . . 
H20B H 0.2410 0.9649 1.1954 0.046 Uiso 1 1 calc R . . 
H20C H 0.2503 0.9543 1.3349 0.046 Uiso 1 1 calc R . . 
C15 C -0.0148(4) 0.86342(13) 1.3432(3) 0.0288(8) Uani 1 1 d . . . 
C27 C 0.5155(3) 0.82469(13) 1.0659(3) 0.0283(8) Uani 1 1 d . . . 
H27A H 0.5158 0.7984 1.0118 0.034 Uiso 1 1 calc R . . 
H27B H 0.5499 0.8506 1.0222 0.034 Uiso 1 1 calc R . . 
C36 C 0.1165(4) 0.82259(13) 0.7870(4) 0.0330(9) Uani 1 1 d . . . 
H36 H 0.0661 0.8405 0.7300 0.040 Uiso 1 1 calc R . . 
C26 C 0.3336(4) 0.79537(12) 1.1760(4) 0.0299(8) Uani 1 1 d . . . 
H26A H 0.2489 0.8018 1.2008 0.036 Uiso 1 1 calc R . . 
H26B H 0.3326 0.7682 1.1252 0.036 Uiso 1 1 calc R . . 
C12 C 0.0590(3) 0.91217(11) 1.1414(3) 0.0204(6) Uani 1 1 d . . . 
C3 C 0.0684(3) 0.97349(12) 1.0061(3) 0.0254(7) Uani 1 1 d . . . 
C6 C 0.4055(3) 0.94220(10) 0.8173(3) 0.0193(6) Uani 1 1 d . . . 
C25 C 0.3876(3) 0.87630(12) 1.1870(3) 0.0275(7) Uani 1 1 d . . . 
H25A H 0.3040 0.8837 1.2134 0.033 Uiso 1 1 calc R . . 
H25B H 0.4199 0.9024 1.1426 0.033 Uiso 1 1 calc R . . 
C4 C 0.2943(4) 1.02520(12) 0.7865(3) 0.0322(8) Uani 1 1 d . . . 
H4A H 0.3665 1.0372 0.8265 0.048 Uiso 1 1 calc R . . 
H4B H 0.2355 1.0495 0.7734 0.048 Uiso 1 1 calc R . . 
H4C H 0.3178 1.0122 0.7098 0.048 Uiso 1 1 calc R . . 
C18 C 0.2864(4) 0.91961(15) 0.6344(4) 0.0338(8) Uani 1 1 d . . . 
H18A H 0.2669 0.9477 0.5933 0.051 Uiso 1 1 calc R . . 
H18B H 0.2213 0.9123 0.6907 0.051 Uiso 1 1 calc R . . 
H18C H 0.2943 0.8954 0.5758 0.051 Uiso 1 1 calc R . . 
C38 C 0.1762(3) 0.77817(13) 0.9412(3) 0.0280(8) Uani 1 1 d . . . 
H38 H 0.1718 0.7560 1.0079 0.034 Uiso 1 1 calc R . . 
C14 C 0.0695(3) 0.89778(11) 1.3523(3) 0.0245(7) Uani 1 1 d . . . 
H14 H 0.1028 0.9046 1.4283 0.029 Uiso 1 1 calc R . . 
C37 C 0.0731(4) 0.79433(13) 0.8801(4) 0.0330(9) Uani 1 1 d . . . 
H37 H -0.0139 0.7884 0.9009 0.040 Uiso 1 1 calc R . . 
C21 C -0.0960(4) 0.87143(16) 1.0151(3) 0.0380(9) Uani 1 1 d . . . 
H21A H -0.1416 0.8432 1.0185 0.057 Uiso 1 1 calc R . . 
H21B H -0.0355 0.8698 0.9511 0.057 Uiso 1 1 calc R . . 
H21C H -0.1521 0.8963 0.9996 0.057 Uiso 1 1 calc R . . 
C40 C 0.2265(5) 0.73991(17) 0.6018(4) 0.0471(12) Uani 1 1 d . . . 
H40 H 0.2599 0.7596 0.5375 0.057 Uiso 1 1 calc R . . 
C2 C 0.1258(4) 0.99947(12) 0.9203(3) 0.0290(8) Uani 1 1 d . . . 
H2 H 0.0869 1.0266 0.8974 0.035 Uiso 1 1 calc R . . 
C11 C 0.5162(4) 0.95088(13) 0.8736(3) 0.0293(8) Uani 1 1 d . . . 
C31 C 0.5974(4) 0.85637(14) 1.2578(5) 0.0415(10) Uani 1 1 d . . . 
H31A H 0.6484 0.8503 1.3286 0.050 Uiso 1 1 calc R . . 
H31B H 0.6329 0.8821 1.2142 0.050 Uiso 1 1 calc R . . 
C17 C -0.0327(3) 0.87904(12) 1.1317(3) 0.0243(7) Uani 1 1 d . . . 
C9 C 0.6233(4) 0.92236(13) 0.7002(4) 0.0392(10) Uani 1 1 d . . . 
C34 C 0.2856(3) 0.80857(11) 0.9194(3) 0.0232(7) Uani 1 1 d . . . 
H34 H 0.3614 0.7901 0.9146 0.028 Uiso 1 1 calc R . . 
C1 C 0.2365(3) 0.98897(12) 0.8644(3) 0.0246(7) Uani 1 1 d . . . 
C28 C 0.5945(4) 0.81454(13) 1.1763(4) 0.0335(9) Uani 1 1 d . . . 
H28 H 0.6791 0.8071 1.1503 0.040 Uiso 1 1 calc R . . 
C16 C -0.0660(3) 0.85513(12) 1.2320(3) 0.0280(8) Uani 1 1 d . . . 
H16 H -0.1258 0.8323 1.2248 0.034 Uiso 1 1 calc R . . 
C19 C 0.5208(4) 0.97340(16) 0.9942(4) 0.0458(11) Uani 1 1 d . . . 
H19A H 0.4379 0.9773 1.0246 0.069 Uiso 1 1 calc R . . 
H19B H 0.5600 1.0028 0.9865 0.069 Uiso 1 1 calc R . . 
H19C H 0.5675 0.9547 1.0495 0.069 Uiso 1 1 calc R . . 
C10 C 0.6237(4) 0.94054(13) 0.8135(4) 0.0356(9) Uani 1 1 d . . . 
H10 H 0.6994 0.9461 0.8516 0.043 Uiso 1 1 calc R . . 
C35 C 0.2450(3) 0.82211(12) 0.7949(3) 0.0282(8) Uani 1 1 d . . . 
H35 H 0.2993 0.8377 0.7366 0.034 Uiso 1 1 calc R . . 
C39 C 0.2955(5) 0.71776(17) 0.6903(5) 0.0493(12) Uani 1 1 d . . . 
H39 H 0.3859 0.7188 0.6998 0.059 Uiso 1 1 calc R . . 
C30 C 0.4118(4) 0.78659(13) 1.2865(3) 0.0355(9) Uani 1 1 d . . . 
H30 H 0.3773 0.7607 1.3319 0.043 Uiso 1 1 calc R . . 
C5 C -0.0428(4) 0.99349(14) 1.0669(4) 0.0363(9) Uani 1 1 d . . . 
H5A H -0.1113 0.9726 1.0600 0.054 Uiso 1 1 calc R . . 
H5B H -0.0639 1.0220 1.0287 0.054 Uiso 1 1 calc R . . 
H5C H -0.0247 0.9987 1.1512 0.054 Uiso 1 1 calc R . . 
C29 C 0.4678(4) 0.86751(14) 1.2964(3) 0.0363(9) Uani 1 1 d . . . 
H29 H 0.4687 0.8948 1.3483 0.044 Uiso 1 1 calc R . . 
C8 C 0.5138(4) 0.91494(13) 0.6461(4) 0.0318(8) Uani 1 1 d . . . 
H8 H 0.5130 0.9025 0.5682 0.038 Uiso 1 1 calc R . . 
C33 C 0.5417(4) 0.77508(14) 1.2459(4) 0.0383(10) Uani 1 1 d . . . 
H33A H 0.5932 0.7687 1.3162 0.046 Uiso 1 1 calc R . . 
H33B H 0.5402 0.7480 1.1949 0.046 Uiso 1 1 calc R . . 
C23 C -0.0480(5) 0.83526(16) 1.4506(4) 0.0471(11) Uani 1 1 d . . . 
H23A H -0.1322 0.8248 1.4428 0.071 Uiso 1 1 calc R . . 
H23B H -0.0400 0.8534 1.5230 0.071 Uiso 1 1 calc R . . 
H23C H 0.0066 0.8093 1.4554 0.071 Uiso 1 1 calc R . . 
C43 C 0.2148(5) 0.69376(14) 0.7602(5) 0.0481(11) Uani 1 1 d . . . 
H43 H 0.2373 0.6749 0.8305 0.058 Uiso 1 1 calc R . . 
C42 C 0.0967(5) 0.69953(16) 0.7159(5) 0.0532(13) Uani 1 1 d . . . 
H42 H 0.0209 0.6859 0.7493 0.064 Uiso 1 1 calc R . . 
C22 C 0.7424(4) 0.91243(19) 0.6371(6) 0.0606(16) Uani 1 1 d . . . 
H22A H 0.7672 0.9387 0.5905 0.091 Uiso 1 1 calc R . . 
H22B H 0.7317 0.8866 0.5839 0.091 Uiso 1 1 calc R . . 
H22C H 0.8053 0.9055 0.6962 0.091 Uiso 1 1 calc R . . 
C41 C 0.1036(5) 0.72774(17) 0.6159(5) 0.0538(14) Uani 1 1 d . . . 
H41 H 0.0339 0.7379 0.5655 0.065 Uiso 1 1 calc R . . 
C32 C 0.4143(4) 0.82792(15) 1.3659(4) 0.0390(10) Uani 1 1 d . . . 
H32A H 0.4644 0.8219 1.4374 0.047 Uiso 1 1 calc R . . 
H32B H 0.3307 0.8353 1.3924 0.047 Uiso 1 1 calc R . . 
 
loop_ 
 _atom_site_aniso_label 
 _atom_site_aniso_U_11 
 _atom_site_aniso_U_22 
 _atom_site_aniso_U_33 
 _atom_site_aniso_U_23 
 _atom_site_aniso_U_13 
 _atom_site_aniso_U_12 
Ni1 0.02329(19) 0.01711(17) 0.02090(18) 0.00182(19) 0.00164(19) 0.00329(16) 
Co2 0.0329(2) 0.0229(2) 0.0269(2) -0.0051(2) -0.0058(2) -0.00084(19) 
N3 0.0190(12) 0.0199(13) 0.0226(15) -0.0009(11) 0.0006(11) 0.0006(10) 
N2 0.0248(14) 0.0205(14) 0.0228(14) 0.0042(11) 0.0044(12) 0.0063(11) 
N1 0.0270(14) 0.0173(13) 0.0203(14) 0.0003(11) 0.0033(12) 0.0014(11) 
C13 0.0210(15) 0.0203(16) 0.0244(17) -0.0008(14) 0.0036(14) 0.0025(12) 
C7 0.039(2) 0.0140(15) 0.0210(17) 0.0033(13) 0.0013(15) 0.0011(14) 
C24 0.0250(16) 0.0177(16) 0.0222(16) -0.0014(13) -0.0018(13) 0.0002(13) 
C20 0.0298(18) 0.0282(17) 0.0340(18) -0.0064(17) 0.0005(18) 0.0005(14) 
C15 0.0326(19) 0.0298(19) 0.0239(18) 0.0035(14) 0.0085(15) 0.0037(16) 
C27 0.0254(17) 0.0264(18) 0.0331(19) -0.0049(15) 0.0005(15) 0.0000(14) 
C36 0.040(2) 0.0270(18) 0.033(2) -0.0075(15) -0.0091(17) 0.0053(15) 
C26 0.0332(19) 0.0266(18) 0.0301(18) 0.0034(15) -0.0028(16) -0.0010(15) 
C12 0.0230(15) 0.0158(15) 0.0223(16) 0.0014(12) 0.0034(13) 0.0058(12) 
C3 0.0294(17) 0.0250(17) 0.0218(17) 0.0035(13) 0.0009(13) 0.0104(14) 
C6 0.0273(17) 0.0121(14) 0.0185(15) 0.0036(12) 0.0026(13) -0.0033(12) 
C25 0.0315(18) 0.0235(17) 0.0275(18) -0.0031(14) -0.0074(16) 0.0035(14) 
C4 0.042(2) 0.0211(17) 0.034(2) 0.0058(15) 0.0057(17) 0.0061(15) 
C18 0.042(2) 0.035(2) 0.0249(19) -0.0007(16) -0.0093(17) 0.0009(17) 
C38 0.0332(19) 0.0232(17) 0.0275(18) -0.0024(13) 0.0008(14) -0.0071(14) 
C14 0.0349(19) 0.0172(16) 0.0215(16) -0.0028(13) 0.0006(14) 0.0065(14) 
C37 0.033(2) 0.0298(19) 0.036(2) -0.0128(17) 0.0037(16) -0.0011(16) 
C21 0.033(2) 0.053(3) 0.0276(19) -0.0049(18) -0.0031(16) -0.0002(18) 
C40 0.068(3) 0.045(3) 0.029(2) -0.0115(18) 0.003(2) 0.003(2) 
C2 0.0371(19) 0.0215(17) 0.0285(18) 0.0044(14) 0.0020(16) 0.0139(15) 
C11 0.0315(19) 0.0263(18) 0.0300(19) 0.0074(15) -0.0018(16) -0.0061(15) 
C31 0.035(2) 0.037(2) 0.052(3) -0.012(2) -0.021(2) 0.0024(16) 
C17 0.0188(15) 0.0291(18) 0.0250(17) -0.0023(14) 0.0022(14) 0.0006(13) 
C9 0.039(2) 0.0248(19) 0.053(3) 0.0137(18) 0.015(2) 0.0068(16) 
C34 0.0261(16) 0.0199(16) 0.0235(16) -0.0045(13) -0.0011(14) 0.0011(13) 
C1 0.0343(19) 0.0183(16) 0.0212(16) 0.0008(12) -0.0019(14) 0.0008(14) 
C28 0.0307(19) 0.032(2) 0.038(2) -0.0116(17) -0.0104(17) 0.0082(15) 
C16 0.0232(17) 0.0272(18) 0.034(2) -0.0012(15) 0.0035(15) -0.0028(14) 
C19 0.049(2) 0.051(3) 0.037(2) -0.001(2) -0.012(2) -0.023(2) 
C10 0.0264(18) 0.029(2) 0.051(2) 0.0139(18) -0.0021(18) -0.0043(15) 
C35 0.0338(19) 0.0216(17) 0.0291(19) -0.0019(14) -0.0031(15) -0.0021(14) 
C39 0.040(2) 0.052(3) 0.056(3) -0.027(2) -0.003(2) 0.011(2) 
C30 0.047(2) 0.031(2) 0.028(2) 0.0106(16) -0.0039(17) 0.0014(17) 
C5 0.038(2) 0.037(2) 0.033(2) 0.0077(17) 0.0098(18) 0.0187(18) 
C29 0.045(2) 0.034(2) 0.029(2) -0.0160(16) -0.0109(17) 0.0123(17) 
C8 0.045(2) 0.0233(17) 0.0275(18) 0.0015(14) 0.0111(17) 0.0066(16) 
C33 0.046(2) 0.031(2) 0.037(2) -0.0014(17) -0.0159(19) 0.0139(17) 
C23 0.061(3) 0.043(2) 0.037(3) 0.0109(19) 0.015(2) -0.006(2) 
C43 0.077(3) 0.027(2) 0.040(2) -0.0058(19) -0.004(3) 0.011(2) 
C42 0.058(3) 0.039(3) 0.063(3) -0.024(2) 0.005(3) -0.015(2) 
C22 0.047(3) 0.046(3) 0.089(4) 0.020(3) 0.033(3) 0.014(2) 
C41 0.069(3) 0.046(3) 0.047(3) -0.024(2) -0.029(3) 0.008(2) 
C32 0.050(3) 0.046(2) 0.0210(18) -0.0022(17) -0.0096(17) 0.012(2) 
 
_geom_special_details 
; 
 All esds (except the esd in the dihedral angle between two l.s. planes) 
 are estimated using the full covariance matrix.  The cell esds are taken 
 into account individually in the estimation of esds in distances, angles 
 and torsion angles; correlations between esds in cell parameters are only 
 used when they are defined by crystal symmetry.  An approximate (isotropic) 
 treatment of cell esds is used for estimating esds involving l.s. planes. 
; 
 
loop_ 
 _geom_bond_atom_site_label_1 
 _geom_bond_atom_site_label_2 
 _geom_bond_distance 
 _geom_bond_site_symmetry_2 
 _geom_bond_publ_flag 
Ni1 N3 1.812(3) . ? 
Ni1 N2 1.879(3) . ? 
Ni1 N1 1.881(3) . ? 
Co2 C36 1.962(4) . ? 
Co2 C37 1.963(4) . ? 
Co2 C35 2.026(4) . ? 
Co2 C40 2.031(4) . ? 
Co2 C38 2.037(4) . ? 
Co2 C39 2.042(4) . ? 
Co2 C43 2.042(4) . ? 
Co2 C42 2.077(4) . ? 
Co2 C41 2.090(4) . ? 
N3 C34 1.473(4) . ? 
N3 C24 1.481(4) . ? 
N2 C3 1.328(4) . ? 
N2 C12 1.425(4) . ? 
N1 C1 1.325(5) . ? 
N1 C6 1.439(4) . ? 
C13 C14 1.388(5) . ? 
C13 C12 1.409(5) . ? 
C13 C20 1.499(5) . ? 
C7 C8 1.386(5) . ? 
C7 C6 1.409(5) . ? 
C7 C18 1.498(5) . ? 
C24 C25 1.534(5) . ? 
C24 C26 1.538(5) . ? 
C24 C27 1.544(5) . ? 
C15 C14 1.384(5) . ? 
C15 C16 1.392(6) . ? 
C15 C23 1.513(5) . ? 
C27 C28 1.543(5) . ? 
C36 C35 1.415(6) . ? 
C36 C37 1.425(6) . ? 
C26 C30 1.531(5) . ? 
C12 C17 1.414(5) . ? 
C3 C2 1.387(5) . ? 
C3 C5 1.521(5) . ? 
C6 C11 1.395(5) . ? 
C25 C29 1.534(5) . ? 
C4 C1 1.527(5) . ? 
C38 C37 1.409(6) . ? 
C38 C34 1.524(5) . ? 
C21 C17 1.500(5) . ? 
C40 C41 1.407(8) . ? 
C40 C39 1.413(7) . ? 
C2 C1 1.405(5) . ? 
C11 C10 1.395(6) . ? 
C11 C19 1.512(6) . ? 
C31 C29 1.525(6) . ? 
C31 C28 1.546(6) . ? 
C17 C16 1.382(5) . ? 
C9 C8 1.366(6) . ? 
C9 C10 1.383(6) . ? 
C9 C22 1.518(6) . ? 
C34 C35 1.522(5) . ? 
C28 C33 1.526(6) . ? 
C39 C43 1.384(8) . ? 
C30 C32 1.520(6) . ? 
C30 C33 1.537(6) . ? 
C29 C32 1.531(7) . ? 
C43 C42 1.401(7) . ? 
C42 C41 1.404(8) . ? 
 
loop_ 
 _geom_angle_atom_site_label_1 
 _geom_angle_atom_site_label_2 
 _geom_angle_atom_site_label_3 
 _geom_angle 
 _geom_angle_site_symmetry_1 
 _geom_angle_site_symmetry_3 
 _geom_angle_publ_flag 
N3 Ni1 N2 133.17(12) . . ? 
N3 Ni1 N1 132.79(13) . . ? 
N2 Ni1 N1 93.95(12) . . ? 
C36 Co2 C37 42.57(17) . . ? 
C36 Co2 C35 41.54(16) . . ? 
C37 Co2 C35 69.52(16) . . ? 
C36 Co2 C40 119.03(19) . . ? 
C37 Co2 C40 155.5(2) . . ? 
C35 Co2 C40 107.72(19) . . ? 
C36 Co2 C38 69.33(16) . . ? 
C37 Co2 C38 41.22(17) . . ? 
C35 Co2 C38 66.67(15) . . ? 
C40 Co2 C38 161.60(19) . . ? 
C36 Co2 C39 147.7(2) . . ? 
C37 Co2 C39 163.8(2) . . ? 
C35 Co2 C39 111.80(19) . . ? 
C40 Co2 C39 40.6(2) . . ? 
C38 Co2 C39 123.38(19) . . ? 
C36 Co2 C43 172.7(2) . . ? 
C37 Co2 C43 130.3(2) . . ? 
C35 Co2 C43 142.86(19) . . ? 
C40 Co2 C43 67.1(2) . . ? 
C38 Co2 C43 106.09(19) . . ? 
C39 Co2 C43 39.6(2) . . ? 
C36 Co2 C42 136.9(2) . . ? 
C37 Co2 C42 113.69(19) . . ? 
C35 Co2 C42 173.4(2) . . ? 
C40 Co2 C42 66.8(2) . . ? 
C38 Co2 C42 119.69(19) . . ? 
C39 Co2 C42 66.9(2) . . ? 
C43 Co2 C42 39.8(2) . . ? 
C36 Co2 C41 115.02(18) . . ? 
C37 Co2 C41 124.3(2) . . ? 
C35 Co2 C41 134.01(19) . . ? 
C40 Co2 C41 39.9(2) . . ? 
C38 Co2 C41 155.0(2) . . ? 
C39 Co2 C41 67.2(2) . . ? 
C43 Co2 C41 66.6(2) . . ? 
C42 Co2 C41 39.4(2) . . ? 
C34 N3 C24 113.6(3) . . ? 
C34 N3 Ni1 122.4(2) . . ? 
C24 N3 Ni1 123.9(2) . . ? 
C3 N2 C12 119.4(3) . . ? 
C3 N2 Ni1 127.3(2) . . ? 
C12 N2 Ni1 112.7(2) . . ? 
C1 N1 C6 118.9(3) . . ? 
C1 N1 Ni1 126.9(3) . . ? 
C6 N1 Ni1 114.2(2) . . ? 
C14 C13 C12 118.9(3) . . ? 
C14 C13 C20 120.5(4) . . ? 
C12 C13 C20 120.5(3) . . ? 
C8 C7 C6 118.5(4) . . ? 
C8 C7 C18 120.7(3) . . ? 
C6 C7 C18 120.7(3) . . ? 
N3 C24 C25 107.9(3) . . ? 
N3 C24 C26 111.4(3) . . ? 
C25 C24 C26 108.0(3) . . ? 
N3 C24 C27 112.6(3) . . ? 
C25 C24 C27 107.8(3) . . ? 
C26 C24 C27 108.9(3) . . ? 
C14 C15 C16 117.9(3) . . ? 
C14 C15 C23 120.9(4) . . ? 
C16 C15 C23 121.3(4) . . ? 
C28 C27 C24 110.0(3) . . ? 
C35 C36 C37 106.4(3) . . ? 
C35 C36 Co2 71.6(2) . . ? 
C37 C36 Co2 68.7(2) . . ? 
C30 C26 C24 110.8(3) . . ? 
C13 C12 C17 119.4(3) . . ? 
C13 C12 N2 119.8(3) . . ? 
C17 C12 N2 120.7(3) . . ? 
N2 C3 C2 122.9(3) . . ? 
N2 C3 C5 119.8(3) . . ? 
C2 C3 C5 117.3(3) . . ? 
C11 C6 C7 120.0(3) . . ? 
C11 C6 N1 120.0(3) . . ? 
C7 C6 N1 119.9(3) . . ? 
C24 C25 C29 111.4(3) . . ? 
C37 C38 C34 110.7(3) . . ? 
C37 C38 Co2 66.6(2) . . ? 
C34 C38 Co2 90.8(2) . . ? 
C15 C14 C13 122.3(3) . . ? 
C38 C37 C36 106.8(3) . . ? 
C38 C37 Co2 72.2(2) . . ? 
C36 C37 Co2 68.7(2) . . ? 
C41 C40 C39 108.4(5) . . ? 
C41 C40 Co2 72.3(3) . . ? 
C39 C40 Co2 70.1(3) . . ? 
C3 C2 C1 125.5(3) . . ? 
C6 C11 C10 118.6(4) . . ? 
C6 C11 C19 121.2(4) . . ? 
C10 C11 C19 120.2(4) . . ? 
C29 C31 C28 108.9(3) . . ? 
C16 C17 C12 119.0(3) . . ? 
C16 C17 C21 120.7(3) . . ? 
C12 C17 C21 120.2(3) . . ? 
C8 C9 C10 118.4(4) . . ? 
C8 C9 C22 121.4(5) . . ? 
C10 C9 C22 120.2(5) . . ? 
N3 C34 C35 114.7(3) . . ? 
N3 C34 C38 117.4(3) . . ? 
C35 C34 C38 94.3(3) . . ? 
N1 C1 C2 122.9(3) . . ? 
N1 C1 C4 119.7(3) . . ? 
C2 C1 C4 117.3(3) . . ? 
C33 C28 C27 110.4(3) . . ? 
C33 C28 C31 109.0(4) . . ? 
C27 C28 C31 109.2(3) . . ? 
C17 C16 C15 122.2(3) . . ? 
C9 C10 C11 121.9(4) . . ? 
C36 C35 C34 110.6(3) . . ? 
C36 C35 Co2 66.8(2) . . ? 
C34 C35 Co2 91.3(2) . . ? 
C43 C39 C40 107.2(5) . . ? 
C43 C39 Co2 70.2(3) . . ? 
C40 C39 Co2 69.3(3) . . ? 
C32 C30 C26 110.3(3) . . ? 
C32 C30 C33 109.7(4) . . ? 
C26 C30 C33 108.6(3) . . ? 
C31 C29 C32 109.6(4) . . ? 
C31 C29 C25 110.2(3) . . ? 
C32 C29 C25 108.6(3) . . ? 
C9 C8 C7 122.5(4) . . ? 
C28 C33 C30 109.5(3) . . ? 
C39 C43 C42 109.2(5) . . ? 
C39 C43 Co2 70.2(3) . . ? 
C42 C43 Co2 71.4(3) . . ? 
C43 C42 C41 107.9(5) . . ? 
C43 C42 Co2 68.8(3) . . ? 
C41 C42 Co2 70.8(3) . . ? 
C42 C41 C40 107.2(4) . . ? 
C42 C41 Co2 69.8(3) . . ? 
C40 C41 Co2 67.8(2) . . ? 
C30 C32 C29 109.4(3) . . ? 
 
_diffrn_measured_fraction_theta_max    0.983 
_diffrn_reflns_theta_full              28.33 
_diffrn_measured_fraction_theta_full   0.983 
_refine_diff_density_max    0.807 
_refine_diff_density_min   -0.695 
_refine_diff_density_rms    0.103 
